**Table S1.** Summary of full general linear models of the effect of carotenoid supplementation on plasma lutein,  $\beta$ -carotene, vitamin E, total antioxidant capacity, reactive oxygen metabolite (ROM), oxidative damage to lipids (MDA) and proteins (carbonyl group), body mass, tarsus length and inflammatory immune response to phytohaemagglutinin (PHA) of yellow legged gull chicks before Paraquat (PQ) administration.

| Dependent variable                                                             | Source of variation           | <i>d.f.</i>               | Estimate $\pm$ SE  | <i>F</i>           | <i>P</i> |                  |
|--------------------------------------------------------------------------------|-------------------------------|---------------------------|--------------------|--------------------|----------|------------------|
| Lutein ( $\mu\text{g ml}^{-1}$ )                                               | Intercept                     |                           | 4.68 $\pm$ 3.04    |                    |          |                  |
|                                                                                | Treatment                     | $\beta$ -carotene         | 2,70               | -0.37 $\pm$ 0.07   | 49.78    | <b>&lt;0.001</b> |
|                                                                                |                               | No carotenoid             |                    | -0.44 $\pm$ 0.07   |          |                  |
|                                                                                | Sex                           | Female                    | 1,70               | -0.03 $\pm$ 0.07   | 0.01     | 0.989            |
|                                                                                | Hatching date                 |                           | 1,70               | -1.84 $\pm$ 1.37   | 1.80     | 0.184            |
|                                                                                | Lutein at hatching            |                           | 1,70               | 0.14 $\pm$ 0.07    | 3.69     | 0.059            |
|                                                                                | Brood size                    |                           | 1,70               | -0.01 $\pm$ 0.04   | 0.01     | 0.950            |
|                                                                                | Treatment $\times$ Sex        | Female, $\beta$ -carotene | 2,70               | -0.01 $\pm$ 0.09   | 1.05     | 0.354            |
|                                                                                |                               | Female, no carotenoid     |                    | 0.10 $\pm$ 0.08    |          |                  |
| $\beta$ -carotene ( $\mu\text{g ml}^{-1}$ )                                    | Intercept                     |                           | -2.39 $\pm$ 2.06   |                    |          |                  |
|                                                                                | Treatment                     | $\beta$ -carotene         | 2,70               | 0.18 $\pm$ 0.05    | 35.83    | <b>&lt;0.001</b> |
|                                                                                |                               | No carotenoid             |                    | -0.02 $\pm$ 0.05   |          |                  |
|                                                                                | Sex                           | Female                    | 1,70               | -0.02 $\pm$ 0.05   | 0.31     | 0.579            |
|                                                                                | Hatching date                 |                           | 1,70               | 1.07 $\pm$ 0.93    | 1.33     | 0.253            |
|                                                                                | $\beta$ -carotene at hatching |                           | 1,70               | -0.01 $\pm$ 0.14   | 0.01     | 0.944            |
|                                                                                | Brood size                    |                           | 1,70               | 0.05 $\pm$ 0.03    | 3.62     | 0.061            |
|                                                                                | Treatment $\times$ Sex        | Female, $\beta$ -carotene | 2,70               | 0.07 $\pm$ 0.06    | 0.74     | 0.483            |
|                                                                                |                               | Female, no carotenoid     |                    | 0.02 $\pm$ 0.06    |          |                  |
| Vitamin E ( $\mu\text{g ml}^{-1}$ )                                            | Intercept                     |                           | -82.13 $\pm$ 57.28 |                    |          |                  |
|                                                                                | Treatment                     | $\beta$ -carotene         | 2,67               | 0.10 $\pm$ 1.31    | 0.16     | 0.853            |
|                                                                                |                               | No carotenoid             |                    | -0.65 $\pm$ 1.30   |          |                  |
|                                                                                | Sex                           | Female                    | 1,67               | -0.73 $\pm$ 1.29   | 1.72     | 0.194            |
|                                                                                | Hatching date                 |                           | 1,67               | 41.63 $\pm$ 25.75  | 2.61     | 0.111            |
|                                                                                | Vitamin E at hatching         |                           | 1,67               | 0.05 $\pm$ 0.04    | 1.12     | 0.295            |
|                                                                                | Brood size                    |                           | 1,67               | 0.23 $\pm$ 0.73    | 0.09     | 0.761            |
|                                                                                | Treatment $\times$ Sex        | Female, $\beta$ -carotene | 2,67               | -1.24 $\pm$ 1.80   | 0.75     | 0.478            |
|                                                                                |                               | Female, no carotenoid     |                    | 0.72 $\pm$ 1.60    |          |                  |
| Total antioxidant capacity<br>(mmol of Trolox<br>equivalents $\text{l}^{-1}$ ) | Intercept                     |                           | -9.94 $\pm$ 4.60   |                    |          |                  |
|                                                                                | Treatment                     | $\beta$ -carotene         | 2,53               | 0.02 $\pm$ 0.11    | 0.35     | 0.710            |
|                                                                                |                               | No carotenoid             |                    | 0.01 $\pm$ 0.11    |          |                  |
|                                                                                | Sex                           | Female                    | 1,53               | 0.02 $\pm$ 0.11    | 0.63     | 0.431            |
|                                                                                | Hatching date                 |                           | 1,53               | 4.82 $\pm$ 2.07    | 5.40     | <b>0.024</b>     |
|                                                                                | MDA at hatching               |                           | 1,53               | -0.05 $\pm$ 0.23   | 0.04     | 0.836            |
|                                                                                | Brood size                    |                           | 1,53               | -0.08 $\pm$ 0.06   | 1.52     | 0.222            |
|                                                                                | Treatment $\times$ Sex        | Female, $\beta$ -carotene | 2,53               | -0.17 $\pm$ 0.16   | 0.60     | 0.552            |
|                                                                                |                               | Female, no carotenoid     |                    | -0.04 $\pm$ 0.14   |          |                  |
| ROM (mmol $\text{H}_2\text{O}_2 \text{l}^{-1}$ )                               | Intercept                     |                           | 138.71 $\pm$ 91.08 |                    |          |                  |
|                                                                                | Treatment                     | $\beta$ -carotene         | 2,68               | -3.54 $\pm$ 2.04   | 0.78     | 0.461            |
|                                                                                |                               | No carotenoid             |                    | -1.97 $\pm$ 2.05   |          |                  |
|                                                                                | Sex                           | Female                    | 1,68               | -1.77 $\pm$ 2.03   | 0.01     | 0.990            |
|                                                                                | Hatching date                 |                           | 1,68               | -57.60 $\pm$ 40.96 | 1.98     | 0.164            |
|                                                                                | MDA at hatching               |                           | 1,68               | 0.49 $\pm$ 4.56    | 0.01     | 0.914            |
|                                                                                | Brood size                    |                           | 1,68               | 1.03 $\pm$ 1.18    | 0.77     | 0.383            |
|                                                                                | Treatment $\times$ Sex        | Female, $\beta$ -carotene | 2,68               | 4.51 $\pm$ 2.81    | 1.55     | 0.219            |
|                                                                                |                               | Female, no carotenoid     |                    | 0.76 $\pm$ 2.51    |          |                  |

Significant values are represented in bold type

**Table S1** (continue)

| Dependent variable                                               | Source of variation   | <i>d.f.</i>           | Estimate±SE    | <i>F</i>       | <i>P</i> |                  |
|------------------------------------------------------------------|-----------------------|-----------------------|----------------|----------------|----------|------------------|
| MDA<br>(µg MDA ml <sup>-1</sup> )                                | Intercept             |                       | 25.87±25.04    |                |          |                  |
|                                                                  | Treatment             | β-carotene            | 2,38           | 0.29±0.55      | 0.36     | 0.699            |
|                                                                  |                       | No carotenoid         |                | -0.17±0.57     |          |                  |
|                                                                  | Sex                   | Female                | 1,38           | 0.16±0.58      | 0.82     | 0.372            |
|                                                                  |                       |                       |                |                |          |                  |
|                                                                  | Hatching date         |                       | 1,38           | -10.80±11.34   | 0.91     | 0.347            |
|                                                                  | MDA at hatching       |                       | 1,38           | 0.39±1.46      | 0.07     | 0.789            |
|                                                                  | Brood size            |                       | 1,38           | -0.02±0.31     | 0.01     | 0.951            |
|                                                                  | Plasma lipids         |                       | 1,38           | -0.25±0.18     | 1.94     | 0.172            |
|                                                                  | Treatment × Sex       | Female, β-carotene    | 2,38           | -1.32±0.93     | 1.39     | 0.261            |
| Female, no carotenoid                                            |                       |                       | -0.01±0.71     |                |          |                  |
| Carbonyl group<br>(nmol ml <sup>-1</sup> )                       | Intercept             |                       | 16.64±8.03     |                |          |                  |
|                                                                  | Treatment             | β-carotene            | 2,60           | -0.27±0.18     | 1.36     | 0.264            |
|                                                                  |                       | No carotenoid         |                | -0.25±0.19     |          |                  |
|                                                                  | Sex                   | Female                | 1,60           | -0.15±0.19     | 0.22     | 0.638            |
|                                                                  |                       |                       |                |                |          |                  |
|                                                                  | Hatching date         |                       | 1,60           | -7.11±3.59     | 3.91     | 0.052            |
|                                                                  | MDA at hatching       |                       | 1,60           | -0.34±0.38     | 0.82     | 0.368            |
|                                                                  | Brood size            |                       | 1,60           | -0.09±0.10     | 0.95     | 0.333            |
|                                                                  | Plasma protein        |                       | 1,60           | 0.18±0.26      | 0.48     | 0.492            |
|                                                                  | Treatment × Sex       | Female, β-carotene    | 2,60           | 0.19±0.24      | 0.30     | 0.743            |
| Female, no carotenoid                                            |                       |                       | 0.13±0.23      |                |          |                  |
| Body mass (g)                                                    | Intercept             |                       | 1098.84±540.22 |                |          |                  |
|                                                                  | Treatment             | β-carotene            | 2,65           | -6.57±10.71    | 0.13     | 0.878            |
|                                                                  |                       | No carotenoid         |                | -14.54±11.00   |          |                  |
|                                                                  | Sex                   | Female                | 1,65           | -15.79±10.56   | 0.92     | 0.341            |
|                                                                  |                       |                       |                |                |          |                  |
|                                                                  | Hatching date         |                       | 1,65           | -483.63±243.11 | 3.96     | 0.051            |
|                                                                  | Body mass at hatching |                       | 1,65           | 1.48±0.56      | 6.95     | <b>0.010</b>     |
|                                                                  | Brood size            |                       | 1,65           | -8.27±6.48     | 1.63     | 0.207            |
|                                                                  | Treatment × Sex       | Female, β-carotene    | 2,65           | 5.31±14.86     | 1.90     | 0.158            |
|                                                                  |                       | Female, no carotenoid |                | 25.10±13.93    |          |                  |
| Tarsus length (mm)                                               | Intercept             |                       | 82.27±49.55    |                |          |                  |
|                                                                  | Treatment             | β-carotene            | 2,65           | -0.18±0.96     | 0.27     | 0.765            |
|                                                                  |                       | No carotenoid         |                | -0.21±0.99     |          |                  |
|                                                                  | Sex                   | Female                | 1,65           | -0.96±0.96     | 2.01     | 0.162            |
|                                                                  |                       |                       |                |                |          |                  |
|                                                                  | Hatching date         |                       | 1,65           | -33.63±21.97   | 2.34     | 0.131            |
|                                                                  | Tarsus at hatching    |                       | 1,65           | 1.00±0.23      | 18.67    | <b>&lt;0.001</b> |
|                                                                  | Brood size            |                       | 1,65           | -1.13±0.59     | 3.66     | 0.060            |
|                                                                  | Treatment × Sex       | Female, β-carotene    | 2,65           | -0.17±1.34     | 0.37     | 0.693            |
|                                                                  |                       | Female, no carotenoid |                | 0.80±1.23      |          |                  |
| Inflammatory immune<br>response to PHA at<br>8 days if life (mm) | Intercept             |                       | -0.99±9.55     |                |          |                  |
|                                                                  | Treatment             | β-carotene            | 2,47           | 0.14±0.18      | 8.23     | <b>0.001</b>     |
|                                                                  |                       | No carotenoid         |                | -0.38±0.20     |          |                  |
|                                                                  | Sex                   | Female                | 1,47           | 0.05±0.19      | 1.78     | 0.189            |
|                                                                  |                       |                       |                |                |          |                  |
|                                                                  | Hatching date         |                       | 1,47           | 0.16±4.30      | 0.01     | 0.971            |
|                                                                  | Body mass at hatching |                       | 1,47           | 0.01±0.01      | 1.85     | 0.181            |
|                                                                  | Brood size            |                       | 1,47           | 0.14±0.11      | 1.73     | 0.194            |
|                                                                  | Treatment × Sex       | Female, β-carotene    | 2,47           | 0.08±0.26      | 0.34     | 0.713            |
|                                                                  |                       | Female, no carotenoid |                | 0.21±0.26      |          |                  |

Significant values are represented in bold type

**Table S2.** Summary of full mixed models of the effect of carotenoid supplementation on plasma lutein,  $\beta$ -carotene, vitamin E, total antioxidant capacity, reactive oxygen metabolite (ROM), oxidative damage to lipids (MDA) and proteins (carbonyl group), body mass and tarsus length of yellow legged gull chicks after Paraquat (PQ) administration (at 9 and 12 days of age).

| Dependent variable               | Source of variation                         | <i>d.f.</i>                  | Estimate $\pm$ SE | <i>F</i>         | <i>P</i>        |                  |
|----------------------------------|---------------------------------------------|------------------------------|-------------------|------------------|-----------------|------------------|
| Lutein ( $\mu\text{g ml}^{-1}$ ) | Intercept                                   |                              | 10.77 $\pm$ 4.24  |                  |                 |                  |
|                                  | Treatment                                   | $\beta$ -carotene+PQ         | 3,36.70           | 0.09 $\pm$ 0.09  | 33.83           | <b>&lt;0.001</b> |
|                                  |                                             | No carotenoid-no PQ          |                   | -0.02 $\pm$ 0.13 |                 |                  |
|                                  |                                             | Lutein+PQ                    |                   | 0.40 $\pm$ 0.09  |                 |                  |
|                                  | Sex                                         | Female                       | 1,37.62           | -0.04 $\pm$ 0.09 | 0.01            | 0.942            |
|                                  |                                             | Age                          | 9 days of age     | 1,38.35          | 0.15 $\pm$ 0.07 | 7.59             |
|                                  | Hatching date                               |                              | 1,40.12           | -4.84 $\pm$ 1.92 | 6.39            | <b>0.016</b>     |
|                                  | Brood size                                  |                              | 1,31.15           | -0.04 $\pm$ 0.04 | 1.00            | 0.324            |
|                                  | Lutein at hatching                          |                              | 1,33.02           | 0.14 $\pm$ 0.08  | 2.89            | 0.099            |
|                                  | Treatment $\times$ Age                      | Age 9, $\beta$ -carotene+PQ  | 3,37.98           | -0.21 $\pm$ 0.07 | 2.75            | 0.056            |
|                                  |                                             | Age 9, no carotenoid-no PQ   |                   | -0.09 $\pm$ 0.09 |                 |                  |
|                                  |                                             | Age 9, lutein+PQ             |                   | -0.07 $\pm$ 0.07 |                 |                  |
|                                  | Treatment $\times$ Sex                      | Female, $\beta$ -carotene+PQ | 3,34.74           | -0.04 $\pm$ 0.12 | 1.28            | 0.297            |
|                                  |                                             | Female, no carotenoid-no PQ  |                   | 0.01 $\pm$ 0.14  |                 |                  |
|                                  |                                             | Female, lutein+PQ            |                   | 0.15 $\pm$ 0.12  |                 |                  |
|                                  | Sex $\times$ Age                            | Age 9, female                | 1,37.96           | 0.03 $\pm$ 0.06  | 0.30            | 0.589            |
|                                  | $\beta$ -carotene ( $\mu\text{g ml}^{-1}$ ) | Intercept                    |                   | -0.34 $\pm$ 2.38 |                 |                  |
| Treatment                        |                                             | $\beta$ -carotene+PQ         | 3,25.71           | 0.12 $\pm$ 0.07  | 10.14           | <b>&lt;0.001</b> |
|                                  |                                             | No carotenoid-no PQ          |                   | -0.06 $\pm$ 0.09 |                 |                  |
|                                  |                                             | Lutein+PQ                    |                   | 0.05 $\pm$ 0.07  |                 |                  |
| Sex                              |                                             | Female                       | 1,27.29           | 0.12 $\pm$ 0.06  | 5.20            | <b>0.031</b>     |
|                                  |                                             | Age                          | 9 days of age     | 1,32.40          | 0.03 $\pm$ 0.08 | 0.01             |
| Hatching date                    |                                             |                              | 1,33.96           | 0.21 $\pm$ 1.08  | 0.04            | 0.849            |
| Brood size                       |                                             |                              | 1,28.08           | -0.09 $\pm$ 0.14 | 0.38            | 0.541            |
| $\beta$ -carotene at hatching    |                                             |                              | 1,23.67           | -0.03 $\pm$ 0.02 | 2.53            | 0.125            |
| Treatment $\times$ Age           |                                             | Age 9, $\beta$ -carotene+PQ  | 3,31.99           | 0.09 $\pm$ 0.09  | 0.88            | 0.462            |
|                                  |                                             | Age 9, no carotenoid-no PQ   |                   | 0.03 $\pm$ 0.09  |                 |                  |
|                                  |                                             | Age 9, lutein+PQ             |                   | -0.04 $\pm$ 0.09 |                 |                  |
| Treatment $\times$ Sex           |                                             | Female, $\beta$ -carotene+PQ | 3,27.59           | -0.03 $\pm$ 0.07 | 0.30            | 0.823            |
|                                  |                                             | Female, no carotenoid-no PQ  |                   | 0.04 $\pm$ 0.08  |                 |                  |
|                                  |                                             | Female, lutein+PQ            |                   | -0.03 $\pm$ 0.07 |                 |                  |
| Sex $\times$ Age                 |                                             | Age 9, female                | 1,31.95           | -0.11 $\pm$ 0.06 | 2.79            | 0.105            |

Significant values are represented in bold type

**Table S2.** (continue)

| Dependent variable                                                             | Source of variation        | <i>df</i>                   | Estimate±SE          | <i>F</i>     | <i>P</i>   |              |
|--------------------------------------------------------------------------------|----------------------------|-----------------------------|----------------------|--------------|------------|--------------|
| Vitamin E (µg ml <sup>-1</sup> )                                               | Intercept                  |                             | 60.97±63.00          |              |            |              |
|                                                                                | Treatment                  | β-carotene+PQ               | 3,26.03              | 5.08±1.87    | 5.51       | <b>0.005</b> |
|                                                                                |                            | No carotenoid-no PQ         |                      | 4.90±2.32    |            |              |
|                                                                                |                            | Lutein+PQ                   |                      | 5.33±1.69    |            |              |
|                                                                                | Sex                        | Female                      | 1,28.17              | 3.06±1.66    | 0.27       | 0.608        |
|                                                                                |                            | Age                         | 9 days of age        | 1,32.36      | 1.98±1.60  | 2.25         |
|                                                                                | Hatching date              |                             | 1,32.86              | -26.12±28.58 | 0.84       | 0.367        |
|                                                                                | Brood size                 |                             | 1,23.17              | -0.52±0.58   | 0.79       | 0.382        |
|                                                                                | Vitamin E at hatching      |                             | 1,29.18              | 0.05±0.04    | 1.17       | 0.289        |
|                                                                                |                            | Treatment × Age             | Age 9, β-carotene+PQ | 3,31.73      | -2.70±1.75 | 0.92         |
|                                                                                | Age 9, no carotenoid-no PQ |                             |                      | -1.42±1.75   |            |              |
|                                                                                | Age 9, lutein+PQ           |                             |                      | -0.69±1.73   |            |              |
|                                                                                | Treatment × Sex            | Female, β-carotene+PQ       | 3,26.39              | -3.51±2.09   | 1.65       | 0.202        |
|                                                                                |                            | Female, no carotenoid-no PQ |                      | -5.11±2.35   |            |              |
| Female, lutein+PQ                                                              |                            |                             | -2.86±1.86           |              |            |              |
| Sex × Age                                                                      | Age 9, female              | 1,31.81                     | 0.31±1.29            | 0.06         | 0.815      |              |
| Total antioxidant capacity<br>(mmol of Trolox<br>equivalents l <sup>-1</sup> ) | Intercept                  |                             | -6.08±4.75           |              |            |              |
|                                                                                | Treatment                  | β-carotene+PQ               | 3,24.98              | 0.13±0.12    | 0.82       | 0.497        |
|                                                                                |                            | No carotenoid-no PQ         |                      | 0.03±0.17    |            |              |
|                                                                                |                            | Lutein+PQ                   |                      | 0.05±0.11    |            |              |
|                                                                                | Sex                        | Female                      | 1,25.02              | -0.04±0.11   | 4.65       | <b>0.041</b> |
|                                                                                |                            | Age                         | 9 days of age        | 1,30.09      | 0.03±0.11  | 0.18         |
|                                                                                | Hatching date              |                             | 1,32.48              | 3.02±2.15    | 1.96       | 0.171        |
|                                                                                | Brood size                 |                             | 1,24.02              | -0.03±0.05   | 0.38       | 0.542        |
|                                                                                | MDA at hatching            |                             | 1,25.81              | -0.24±0.22   | 1.17       | 0.290        |
|                                                                                |                            | Treatment × Age             | Age 9, β-carotene+PQ | 3,29.67      | -0.19±0.11 | 3.61         |
|                                                                                | Age 9, no carotenoid-no PQ |                             |                      | 0.06±0.11    |            |              |
|                                                                                | Age 9, lutein+PQ           |                             |                      | 0.14±0.10    |            |              |
|                                                                                | Treatment × Sex            | Female, β-carotene+PQ       | 3,24.53              | -0.01±0.15   | 0.40       | 0.752        |
|                                                                                |                            | Female, no carotenoid-no PQ |                      | -0.18±0.18   |            |              |
| Female, lutein+PQ                                                              |                            |                             | -0.08±0.13           |              |            |              |
| Sex × Age                                                                      | Age 9, female              | 1,28.59                     | -0.03±0.08           | 0.11         | 0.749      |              |
| ROM (mmol H <sub>2</sub> O <sub>2</sub> l <sup>-1</sup> ),                     | Intercept                  |                             | 119.91±103.70        |              |            |              |
|                                                                                | Treatment                  | β-carotene+PQ               | 3,28.619             | -0.99±2.61   | 2.94       | 0.050        |
|                                                                                |                            | No carotenoid-no PQ         |                      | 7.56±3.49    |            |              |
|                                                                                |                            | Lutein+PQ                   |                      | 2.77±2.50    |            |              |
|                                                                                | Sex                        | Female                      | 1,29.40              | 3.36±2.34    | 0.01       | 0.991        |
|                                                                                |                            | Age                         | 9 days of age        | 1,33.66      | -0.05±2.45 | 0.55         |
|                                                                                | Hatching date              |                             | 1,35.99              | -50.75±47.01 | 1.17       | 0.288        |
|                                                                                | Brood size                 |                             | 1,25.47              | -1.12±0.95   | 1.39       | 0.250        |
|                                                                                | MDA at hatching            |                             | 1,28.58              | 9.02±4.63    | 3.79       | 0.061        |
|                                                                                |                            | Treatment × Age             | Age 9, β-carotene+PQ | 3,33.09      | 0.95±2.78  | 1.06         |
|                                                                                | Age 9, no carotenoid-no PQ |                             |                      | 2.44±2.93    |            |              |
|                                                                                | Age 9, lutein+PQ           |                             |                      | -2.50±2.77   |            |              |
|                                                                                | Treatment × Sex            | Female, β-carotene+PQ       | 3,28.46              | -0.08±2.99   | 2.87       | 0.054        |
|                                                                                |                            | Female, no carotenoid-no PQ |                      | -9.08±3.57   |            |              |
| Female, lutein+PQ                                                              |                            |                             | -0.51±2.84           |              |            |              |
| Sex × Age                                                                      | Age 9, female              | 1,32.85                     | -1.85±2.10           | 0.77         | 0.386      |              |

Significant values are represented in bold type

**Table S2.** (continue)

| Dependent variable             | Source of variation                     | <i>d.f.</i>                | Estimate±SE                 | <i>F</i>        | <i>P</i>     |                  |              |
|--------------------------------|-----------------------------------------|----------------------------|-----------------------------|-----------------|--------------|------------------|--------------|
| MDA (µg MDA ml <sup>-1</sup> ) | Intercept                               |                            | 14.37±18.28                 |                 |              |                  |              |
|                                | Treatment                               | β-carotene+PQ              | 3,24.82                     | -0.54±0.51      | 0.88         | 0.467            |              |
|                                |                                         | No carotenoid-no PQ        |                             | 0.80±0.64       |              |                  |              |
|                                |                                         | Lutein+PQ                  |                             | -0.21±0.47      |              |                  |              |
|                                | Sex                                     | Female                     | 1,24.86                     | -0.44±0.45      | 3.82         | 0.062            |              |
|                                | Age                                     | 9 days of age              | 1,34.13                     | -1.39±0.48      | 1.74         | 0.196            |              |
|                                | Hatching date                           |                            | 1,32.64                     | -5.18±8.25      | 0.39         | 0.535            |              |
|                                | Brood size                              |                            | 1,25.84                     | -0.28±0.17      | 2.63         | 0.117            |              |
|                                | MDA at hatching                         |                            | 1,28.11                     | 0.86±0.86       | 1.00         | 0.326            |              |
|                                | Plasma lipids                           |                            | 1,38.51                     | -0.17±0.10      | 2.74         | 0.106            |              |
|                                | Treatment × Age                         | Age 9, β-carotene+PQ       | 3,32.94                     | 1.11±0.56       | 1.92         | 0.146            |              |
|                                |                                         | Age 9, no carotenoid-no PQ |                             | 0.91±0.53       |              |                  |              |
|                                |                                         | Age 9, lutein+PQ           |                             | 1.08±0.52       |              |                  |              |
|                                |                                         | Treatment × Sex            | Female, β-carotene+PQ       | 3,23.54         | 0.29±0.57    | 2.66             | 0.071        |
|                                |                                         |                            | Female, no carotenoid-no PQ |                 | -1.48±0.67   |                  |              |
|                                |                                         |                            | Female, lutein+PQ           |                 | -0.13±0.53   |                  |              |
|                                | Sex × Age                               | Age 9, female              | 1,33.94                     | 0.73±0.41       | 3.13         | 0.086            |              |
|                                | Carbonyl group (nmol ml <sup>-1</sup> ) | Intercept                  |                             | 2.22±5.75       |              |                  |              |
|                                |                                         | Treatment                  | β-carotene+PQ               | 3,18.349        | 0.22±0.17    | 6.31             | <b>0.004</b> |
| No carotenoid-no PQ            |                                         |                            |                             | 0.41±0.19       |              |                  |              |
| Lutein+PQ                      |                                         |                            |                             | -0.18±0.16      |              |                  |              |
| Sex                            |                                         | Female                     | 1,20.17                     | 0.20±0.14       | 0.82         | 0.375            |              |
| Age                            |                                         | 9 days of age              | 1,28.01                     | 0.13±0.20       | 0.24         | 0.627            |              |
| Hatching date                  |                                         |                            | 1,22.46                     | -0.77±2.60      | 0.09         | 0.771            |              |
| Brood size                     |                                         |                            | 1,15.90                     | -0.01±0.05      | 0.02         | 0.905            |              |
| MDA at hatching                |                                         |                            | 1,16.35                     | -0.25±0.23      | 1.17         | 0.295            |              |
| Plasma protein                 |                                         |                            | 1,38.73                     | -0.11±0.21      | 0.29         | 0.595            |              |
| Treatment × Age                |                                         | Age 9, β-carotene+PQ       | 3,28.05                     | -0.18±0.23      | 1.15         | 0.346            |              |
|                                |                                         | Age 9, no carotenoid-no PQ |                             | 0.05±0.23       |              |                  |              |
|                                |                                         | Age 9, lutein+PQ           |                             | 0.20±0.23       |              |                  |              |
|                                |                                         | Treatment × Sex            | Female, β-carotene+PQ       | 3,17.46         | -0.12±0.16   | 1.71             | 0.203        |
|                                |                                         |                            | Female, no carotenoid-no PQ |                 | -0.40±0.18   |                  |              |
|                                |                                         |                            | Female, lutein+PQ           |                 | -0.07±0.15   |                  |              |
| Sex × Age                      |                                         | Age 9, female              | 1,28.30                     | -0.21±0.17      | 1.56         | 0.222            |              |
| Body mass (g)                  |                                         | Intercept                  |                             | 2390.11±950.53  |              |                  |              |
|                                |                                         | Treatment                  | β-carotene+PQ               | 3,38.78         | 22.33±31.24  | 1.20             | 0.322        |
|                                | No carotenoid-no PQ                     |                            |                             | 29.85±38.15     |              |                  |              |
|                                | Lutein+PQ                               |                            |                             | -32.60±31.24    |              |                  |              |
|                                | Sex                                     | Female                     | 1,38.39                     | -14.77±28.78    | 3.95         | 0.054            |              |
|                                | Age                                     | 9 days of age              | 1,31.28                     | -62.35±15.45    | 35.05        | <b>&lt;0.001</b> |              |
|                                | Hatching date                           |                            | 1,37.00                     | -1040.24±428.25 | 5.90         | <b>0.020</b>     |              |
|                                | Brood size                              |                            | 1,35.11                     | -10.45±9.42     | 1.23         | 0.275            |              |
|                                | Body mass at hatching                   |                            | 1,35.65                     | 1.83±1.01       | 3.26         | 0.080            |              |
|                                | Treatment × Age                         | Age 9, β-carotene+PQ       | 3,31.16                     | 5.27±17.94      | 1.37         | 0.271            |              |
|                                |                                         | Age 9, no carotenoid-no PQ |                             | 2.17±19.05      |              |                  |              |
|                                |                                         | Age 9, lutein+PQ           |                             | 30.37±17.19     |              |                  |              |
|                                |                                         | Treatment × Sex            | Female, β-carotene+PQ       | 3,35.82         | -62.92±30.17 | 1.80             | 0.165        |
|                                |                                         |                            | Female, no carotenoid-no PQ |                 | -36.86±35.57 |                  |              |
|                                |                                         |                            | Female, lutein+PQ           |                 | -14.65±30.07 |                  |              |
|                                | Sex × Age                               | Age 9, female              | 1,31.07                     | 29.01±13.44     | 4.66         | <b>0.039</b>     |              |

Significant values are represented in bold type

**Table S2.** (continue)

| Dependent variable | Source of variation | <i>d.f.</i>                 | Estimate±SE  | <i>F</i>     | <i>P</i> |                  |
|--------------------|---------------------|-----------------------------|--------------|--------------|----------|------------------|
| Tarsus length (mm) | Intercept           |                             | 180.55±91.32 |              |          |                  |
|                    | Treatment           | β-carotene+PQ               | 3,37.66      | 0.90±2.48    | 0.98     | 0.415            |
|                    |                     | No carotenoid-no PQ         |              | 0.01±3.22    |          |                  |
|                    |                     | Lutein+PQ                   |              | -3.56±2.51   |          |                  |
|                    | Sex                 | Female                      | 1,36.53      | -1.96±2.44   | 4.84     | <b>0.034</b>     |
|                    | Age                 | 9 days of age               | 1,31.35      | -4.03±0.73   | 111.14   | <b>&lt;0.001</b> |
|                    | Hatching date       |                             | 1,37.11      | -77.92±41.42 | 3.54     | 0.068            |
|                    | Brood size          |                             | 1,35.25      | -1.04±0.90   | 1.35     | 0.253            |
|                    | Tarsus at hatching  |                             | 1,35.85      | 1.27±0.45    | 8.15     | <b>0.007</b>     |
|                    | Treatment × Age     | Age 9, β-carotene+PQ        | 3,31.22      | 0.05±0.85    | 0.77     | 0.521            |
|                    |                     | Age 9, no carotenoid-no PQ  |              | 0.68±0.90    |          |                  |
|                    |                     | Age 9, lutein+PQ            |              | 1.02±0.81    |          |                  |
|                    | Treatment × Sex     | Female, β-carotene+PQ       | 3,36.14      | -3.23±2.90   | 1.05     | 0.383            |
|                    |                     | Female, no carotenoid-no PQ |              | -1.79±3.42   |          |                  |
|                    |                     | Female, lutein+PQ           |              | 1.11±2.93    |          |                  |
|                    | Sex × Age           | Age 9, female               | 1,31.14      | 0.74±0.63    | 1.35     | 0.254            |

Significant values are represented in bold type

**Table S3.** Summary of full general linear models of the effect of carotenoid supplementation on inflammatory immune response to phytohaemagglutinin (PHA) of yellow legged gull chicks after Paraquat administration (i.e. 12 days of age).

| Dependent variable                                          | Source of variation   |                     | <i>d.f.</i> | Estimate±SE | <i>F</i> | <i>P</i>     |
|-------------------------------------------------------------|-----------------------|---------------------|-------------|-------------|----------|--------------|
| Inflammatory immune response to PHA at 12 days of life (mm) | Intercept             |                     |             | 15.26±13.82 |          |              |
|                                                             | Treatment             | β-carotene+PQ       | 3,25        | 0.16±0.19   | 1.92     | 0.152        |
|                                                             |                       | No carotenoid-no PQ |             | 0.48±0.21   |          |              |
|                                                             |                       | Lutein+PQ           |             | 0.15±0.18   |          |              |
|                                                             | Sex                   | Female              | 1,25        | 0.03±0.15   | 0.05     | 0.828        |
|                                                             | Hatching date         |                     | 1,25        | -7.75±6.24  | 1.54     | 0.226        |
|                                                             | Body mass at hatching |                     | 1,25        | 0.03±0.01   | 4.36     | <b>0.047</b> |
|                                                             | Brood size            |                     | 1,25        | 0.13±0.13   | 0.94     | 0.342        |

Significant values are represented in bold type
